# Supplementary material for: Petrology of the opening eruptive phase of the 2021 Cumbre Vieja eruption, La Palma, Canary Islands
Source: Research Square preprint supplement (doi:10.21203/rs.3.rs-963593/v1), 2021-10-13
Supplement: Supplementary file 1 [file 38fbb80ced955c134cc83582.xlsx]

## Sheet: Modal Min
When using the data please observe the following for presentation:
<0.01 = present but <0.01% or <100ppm (trace)
0= nd (not detected)
Measurement	CSM Lab Code	21JH13a
	Sample Name	3a.Lava CAN_LLP_0001
	Measurement Mode	FieldImage
	Measurement area (mm)	27mm2 diameter
	Measurement Time (H:M:S)	16:48:52
	No. X-ray Analysis Points	7896062
	X-ray Pixel Spacing	5
Mineral Volume(%)	Olivine	2.70042
(area%)	Ca Mg Fe silicates	20.9411
	Ca Fe Al silicates	49.5379
	Plagioclase	19.5885
	Anorthoclase/K-feldspar	0.754452
	Chlorite	0.578972
	Kaolinite	0.000759872
	Biotite	1.64775
	Ilmenite	1.94781
	Ti-Magnetite	2.11869
	Magnetite	0.00572437
	Chrome spinel	0.00744675
	Titanite	0.047682
	Apatite	0.0248605
	Gypsum	0.00055724
	Sulphides	0.0323072
	Others	0.0650198
Grain Size	Olivine	16.1715
(Average Microns)	Ca Mg Fe silicates	19.9565
	Ca Fe Al silicates	20.9526
	Plagioclase	15.356
	Anorthoclase/K-feldspar	8.11681
	Chlorite	8.08732
	Kaolinite	8.33333
	Biotite	8.13888
	Ilmenite	11.6266
	Ti-Magnetite	25.6171
	Magnetite	8.05226
	Chrome spinel	11.1364
	Titanite	7.63588
	Apatite	11.1365
	Gypsum	7.67442
	Sulphides	12.3595
	Others	10.4776

## Sheet: Mineral List
2021
Mineral Category	Mineral Description
Background	All resin mounting media related artefacts and edge effects
Olivine	Any phase with Mg,Fe,Si,O
Ca Mg Fe silicate	Any phase with Ca,Fe,Mg,Si with or without Al. May contain low Ti
Ca Fe Al silicate	Any phase with Ca,Fe,Si,O. May contain trace Al,Mg,K,Na,Ti,P
Plagioclase	Plagioclase Feldspars: phases with Na,Al,Si,O to Ca,Al,Si,O.
Anorthoclase/K-feldspar	Any phase with Na,K,Al,Si,O (Anorthoclase), include Orthoclase/Microcline/Sanidine
Chlorite	Includes any phase with Fe Al Si O, Fe Al Mg Si,O
Kaolinite	Any phase with Al,Si,O such as Kaolinite/Halloysite/Dickite
Biotite	Biotite Mica (Fe,Al,K,Mg,Si,O)
Ilmenite	Any phase with Fe,Ti,O. Includes Mg,Al
Ti-Magnetite	Any phase with Ti (low),Fe,O.
Magnetite	Any phase with Fe,O. Includes Magnetite and other Fe minerals
Chrome spinel	Any phase with Cr,Fe,Mg,Al,O
Titanite	Any phase with Ca,Ti,Si,O
Apatite	Any phase with Ca,P,O.
Gypsum	Any phase with Ca,S,O
Sulphides	Includes Fe-Cu-S (Chalcopyrite, Bornite etc) Fe-S (Pyrrhotite). Includes trace Sphalerite
Others	Boundary effects, indistinguishable minerals, contamination. Includes trace: Quartz, Zircon, Cassiterite, Calcite
18 categories
