# Supplementary material for: Petrology of the opening eruptive phase of the 2021 Cumbre Vieja eruption, La Palma, Canary Islands
Source: Research Square preprint supplement (doi:10.21203/rs.3.rs-963593/v1), 2021-10-13
Supplement: Supplementary file 3 [file 783918ddfe5b0b37f35f1fd3.xlsx]

## Sheet: Cumbre Vieja samples
Sample ID	Type	Date	Lat	Long	notes	Whole Rock geochem	Thin sections	QEMSCAN	EPMA	XRD
CAN_TLP_0001	Tephra	2021-09-19	28.617	-17.903	split into lapilli and ash		Y	Y
CAN_TLP_0008	Tephra	2021-09-22	28.6245	-17.8847		Y				Y
CAN_TLP_0011	Tephra	2021-09-25	28.6612	-17.9141		Y				Y
CAN_TLP_0009	Tephra	2021-09-22			From car travelling within 5 km of vent	Y				Y
CAN_LLP_0001	Lava	2021-09-21	28.6188	-17.8848		Y	Y	Y	Y	Y
CAN_LLP_0002	Lava	2021-09-21	28.6186	-17.9036		Y				Y
CAN_LLP_0003	Lava	2021-09-22	28.6186	-17.9044		Y				Y
CAN_LLP_0004	Lava	2021-09-23	28.6187	-17.9043		Y				Y
