# Supplementary material for: Petrology of the opening eruptive phase of the 2021 Cumbre Vieja eruption, La Palma, Canary Islands
Source: Research Square preprint supplement (doi:10.21203/rs.3.rs-963593/v1), 2021-10-13
Supplement: Supplementary file 5 [file 6fe5cae3f94fe18a2177c8a2.xlsx]

## Sheet: notes
Notes
All analyses are of CAN_LLP_0001
c - core
m - mantle
r - rim

## Sheet: all
id	Na2O	MgO	SiO2	Al2O3	K2O	FeO	MnO	Cl	CaO	TiO2	F	Cr2O3	NiO	Total	X	Y	Z
LLP001 CPX1N	0.6733	12.4751	46.4703	9.1512	0.0154	8.22	0.1177	0	23.5176	3.7283	0.1817	0.0704	0.0123	104.633	5022	41505	-9
LLP001 CPX1N	0.6665	12.1796	46.0275	9.0669	0.0205	7.956	0.1	0.0052	22.0809	3.4574	0.13	0.0655	0.0124	101.768	4804	41297	-6
LLP001 CPX2N	0.7134	14.8347	53.4489	2.5754	0.0185	6.9245	0.1926	0	22.8914	0.6017	0.1647	0.0226	0	102.388	4753	32712	6
LLP001 CPX2B	0.473	14.3511	50.3496	4.7069	0.0181	7.2289	0.1195	0	22.7833	2.0276	0.1511	0.0197	0.0064	102.235	4831	32131	6
LLP001 CPX11X2N	0.6663	12.5251	46.8357	8.0065	0.0168	7.7997	0.1074	0.0038	22.4302	2.8277	0.1383	0.0697	0.0349	101.462	4915	41371	-6
LLP001 CPX11X2B	0.5003	14.3214	50.4143	4.8078	0.0183	7.0556	0.1009	0.0093	22.7781	1.9246	0.1849	0.0261	0.0104	102.152	5189	41543	-9
LLP001 CPX3N	0.9602	9.9442	44.625	9.0691	0.0086	10.5428	0.2411	0	22.5649	3.5779	0.1648	0.0155	0	101.714	3595	26524	4
LLP001 CPX3B	0.496	14.3605	50.4244	4.7225	0.0183	7.0671	0.1195	0.0005	22.7953	1.9475	0.1932	0.0101	0	102.155	3411	26365	1
LLP001 CPX4N	0.5753	12.7703	47.0292	7.3718	0.0114	7.4506	0.132	0	22.9141	3.1325	0.1465	0.0101	0.0188	101.562	20883	8121	4
LLP001 CPX5N	0.6134	12.0349	45.221	9.0031	0.0124	7.8543	0.1437	0	22.3014	3.5905	0.1324	0.1286	0.0038	101.04	21239	8827	1
LLP001 CPX6N	0.587	12.3836	46.1343	8.344	0.0183	7.9123	0.1233	0	22.3424	3.2602	0.1683	0.1403	0.0154	101.43	21440	8290	3
LLP001 CPX7N	0.6907	11.9479	46.8767	7.5823	0.0081	8.3576	0.1629	0.0112	22.6249	3.0626	0.1762	0.0049	0	101.506	21555	30668	-16
LLP001 CPX7B	0.4154	13.6315	48.6672	5.371	0.0278	7.7995	0.1665	0.0091	22.6135	2.7119	0.146	0.0134	0.0206	101.593	21706	30648	-16
LLP001 CPX8N	0.4551	13.7516	48.9752	5.934	0.0102	7.0102	0.0868	0.005	22.851	2.2113	0.1162	0.3231	0.0112	101.741	15452	39044	-19
LLP001 CPX8M	0.979	11.2326	47.9256	6.3684	0.0168	9.8685	0.2717	0.0064	22.387	2.3422	0.187	0.0006	0	101.586	15289	38846	-19
LLP001 CPX8B	0.4525	13.1884	48.1089	5.9375	0.0128	8.082	0.1752	0	22.8105	2.9532	0.1745	0	0	101.895	15262	38738	-16
LLP001 CPX9N	0.9153	10.3934	46.0375	7.7964	0.0084	10.3623	0.2471	0	22.4903	2.897	0.1438	0	0.0004	101.292	13160	33773	-6
LLP001 CPX9B	0.4335	14.1359	49.4065	4.9056	0.0126	7.6132	0.1658	0	22.4727	2.3779	0.1791	0.0248	0.003	101.731	13531	33728	-6
LLP001 CPX10N	0.6326	12.8171	47.4757	7.4886	0.0131	7.6482	0.116	0	22.3512	2.8131	0.177	0.0287	0.0132	101.574	8393	33232	1
LLP001 CPX10B	0.5847	12.5992	46.8647	7.5268	0.0006	7.9	0.1148	0	22.715	2.998	0.1339	0.0186	0.0132	101.469	7685	33215	3
LLP001 CPX11N	0.7881	11.6009	46.6804	7.7805	0.0125	8.8169	0.2166	0	22.6251	2.9933	0.1654	0.0312	0	101.711	6781	28170	9
LLP001 CPX11M	0.5543	12.5234	46.4386	7.8333	0.0145	7.8538	0.1252	0	22.6307	3.3154	0.174	0.0479	0.0297	101.541	6990	28321	9
LLP001 CPX11B	0.4447	14.264	49.8327	4.721	0.0047	7.2716	0.1555	0	22.8229	2.2412	0.1113	0.0029	0.0002	101.873	7055	28346	9
LLP001 CPX12B	0.4599	14.4099	50.2117	4.5108	0.0128	7.078	0.151	0.0029	22.6109	1.9594	0.1648	0.0212	0.003	101.597	5380	19505	12
LLP001 CPX13N	0.678	12.1778	46.5991	7.604	0.0127	8.2412	0.1381	0	22.1344	2.8737	0.1628	0	0.0056	100.627	9026	22209	3
LLP001 CPX13B	0.5694	12.6029	46.7419	7.5206	0.0155	8.0107	0.1241	0.009	22.5448	2.9838	0.2063	0.0316	0.0096	101.37	9020	22311	10
LLP001 OX1	0.0124	6.5294	0.0855	5.8796	0	71.5666	0.4225	0	0.0048	16.4163	0.3348	0.1222	0.0268	101.401	16070	21812	9
LLP001 OX2	0.0062	5.1098	0.0751	4.7122	0	75.0402	0.5628	0	0.0345	14.8922	0.3616	0.0051	0.0075	100.807	5618	19940	13
LLP001 OX4	0	5.799	0.0866	5.8426	0	71.7549	0.4496	0.0026	0.0052	16.2769	0.2978	0.0229	0.0083	100.546	12518	22989	2
LLP001 OX5INOL	0	8.6574	0.0934	12.8474	0	57.2409	0.3079	0	0.0126	10.3984	0.3057	10.6231	0.1612	100.648	6933	15744	16
LLP001 OL1X2N	0.015	41.9202	40.2009	0.0242	0.0042	20.0656	0.3337	0	0.2598	0.0149	0.1629	0.0076	0.1251	103.134	5581	40939	-11
LLP001 OL1X2B	0.0119	41.6266	40.1526	0.0174	0.0183	20.6633	0.3124	0	0.2781	0.0419	0.1565	0	0.0988	103.378	5817	41047	-8
LLP001 OL1N	0.0103	42.8922	40.8513	0.0287	0.0089	20.7843	0.334	0.0019	0.2729	0.0201	0.1538	0.0151	0.1144	105.488	5811	41147	-9
LLP001 OL1N	0.0136	42.2918	40.2768	0.0241	0.0111	20.2786	0.2983	0.0025	0.2556	0.0287	0.1839	0.0193	0.1347	103.819	5593	40947	-6
LLP001 OL2N	0.0122	42.4997	40.4021	0.0263	0.0119	19.8966	0.2707	0	0.2822	0.0317	0.1637	0.0039	0.1343	103.735	11773	24393	8
22921 OL1N	0.0143	41.6583	40.0621	0.022	0.0009	21.0261	0.3177	0.0022	0.3144	0.0445	0.1752	0.0148	0.1186	103.771	-16515	16469	53
22921 OL1N 10 nA	0	41.4878	39.9846	0.0315	0.0184	21.1971	0.3165	0.0098	0.2994	0.0528	0.213	0	0.1043	103.715	-16520	16463	53
LLP001 OL3N	0.0132	42.0902	40.0652	0.0258	0.0044	20.1219	0.308	0.001	0.2667	0.0314	0.1243	0.0203	0.1475	103.22	11777	24372	5
LLP001 OL3B	0.0157	41.8504	40.0565	0.0246	0.0028	20.2393	0.2826	0.0065	0.2862	0.0296	0.0946	0.0203	0.1106	103.02	11946	24427	5
LLP001 OL4N	0.012	42.142	39.845	0.0258	0.0043	19.655	0.2871	0.001	0.2777	0.0282	0.1525	0	0.147	102.577	13068	18328	5
LLP001 OL4B	0.0058	42.1345	39.8917	0.0225	0.0074	19.5971	0.3036	0.0065	0.2966	0.0498	0.148	0.0067	0.1302	102.6	13411	18339	5
LLP001 OL5N	0.6188	12.6946	47.4677	7.1666	0.0141	7.6431	0.1064	0.0002	22.5904	2.6954	0.1439	0.2201	0.0056	101.367	17052	14462	12
LLP001 OL5B	0.4742	14.1887	50.2188	4.7891	0.0193	7.0631	0.1262	0	22.6159	1.9366	0.1816	0.0118	0.0064	101.632	17127	14629	12
LLP001 OL6N	0.0158	42.3714	39.9504	0.0272	0.0069	19.3644	0.2665	0	0.2797	0.0386	0.141	0.0103	0.155	102.627	6998	15669	12
LLP001 OL6B	0.0218	42.5196	40.1497	0.0272	0.0059	19.6155	0.2581	0.005	0.2909	0.035	0.1841	0	0.1526	103.265	7068	15788	16
LLP001 AMP1N	2.5054	13.2247	40.3222	13.7279	1.0782	10.8162	0.1189	0.0095	12.2627	6.2902	0.4316	0.0316	0	100.819	9325	37585	1
LLP001 AMP2N	2.6502	12.3736	39.936	13.4307	1.0292	12.2842	0.1455	0.0041	11.9762	5.9162	0.3765	0.0029	0.0127	100.138	8175	14996	16
LLP001 AMP2B	2.6181	12.2795	39.959	13.5071	1.0511	12.3804	0.1846	0.0177	11.9343	5.8937	0.3953	0.0108	0.0032	100.235	8479	15003	13
LLP001 AMP3N	2.5605	11.6196	39.8546	13.4798	1.0469	13.0272	0.2316	0.0079	12.0743	5.9453	0.357	0.019	0	100.224	23598	13935	4
LLP001 AMP3B	2.572	11.6807	39.7707	13.2729	1.0751	12.8437	0.1944	0.0206	11.9428	5.8169	0.3487	0.0299	0.0173	99.5857	23769	13898	-5
LLP001 AMP4N	2.544	12.5112	39.9214	13.4974	1.1012	11.8339	0.149	0.006	11.9757	6.0575	0.366	0	0.008	99.9711	17818	37426	-21
LLP001 AMP4B	2.5041	12.4648	40.0827	13.4769	1.0895	11.9576	0.1233	0.0139	12.0036	6.0453	0.4049	0.0038	0.001	100.171	18128	37587	-21
LLP001 AMP5N	2.4116	12.0324	39.4253	13.4283	1.2909	12.1833	0.1778	0.016	11.9992	6.2369	0.3718	0.0041	0	99.5778	11557	39512	-15
LLP001 AMP5B	8.3094	2.1587	49.9884	20.7829	4.1307	7.6475	0.1557	0.131	4.8141	2.6189	0.4227	0.0122	0.0048	101.177	11934	39692	-12
LLP001 AMP6N	2.5158	13.0853	40.3104	13.5818	1.0636	10.822	0.1239	0.0127	12.1223	6.2162	0.4032	0.0362	0.0024	100.296	9344	37584	-4
LLP001 AMP6B	2.4962	12.878	40.2833	13.4911	1.0715	11.299	0.1155	0.001	12.0971	6.1675	0.3711	0.0572	0.0042	100.333	10116	37645	-6
LLP001 OX6	0.0072	7.0307	0.097	6.6096	0.0009	69.6181	0.3885	0.0132	0.0434	16.5688	0.3082	0.3019	0.075	101.063	2300	26703	-5
LLP001 OX7	0.0095	6.055	0.0659	5.6462	0	72.093	0.4352	0	0.0043	16.6332	0.3323	0.0242	0.0577	101.356	15882	15108	15
LLP001 OX8	0	6.5456	0.0885	6.3544	0	70.0279	0.4101	0	0.0144	16.1516	0.3429	0.4654	0.0531	100.454	23465	26193	-15
LLP001 OX9INAMPH	0.0024	6.4475	0.0874	6.1261	0	70.3998	0.4102	0.0085	0.0073	15.5869	0.3226	0.2782	0.0315	99.7084	9986	37100	-15
LLP001 OX10	0	6.0254	0.0713	5.1298	0	72.7783	0.426	0	0.0036	15.7926	0.3424	0.0149	0.0371	100.621	10784	21167	5
LLP001 PLAG1GM	3.9697	0.1295	53.2352	29.6859	0.3888	0.9512	0.0093	0.0007	12.6618	0.2196	0.1012	0.0031	0.0041	101.36	13075	27170	1
LLP001 PLAGGM1	3.7864	0.151	52.7631	29.4817	0.3691	0.9766	0	0	12.6257	0.2195	0.0759	0.0017	0	100.451	11039	20805	5
LLP001 PLAGGM2	4.146	0.1069	53.4049	29.4076	0.3901	0.815	0.019	0	12.4721	0.23	0.119	0	0	101.111	10618	20844	8
LLP001 PLAGGM3	4.4144	0.0939	54.0652	28.9779	0.478	0.8416	0.0246	0	11.7473	0.2471	0.0739	0	0.0018	100.966	11978	20008	8
LLP001 PLAGGM4	0.5807	12.353	46.3255	7.814	0.0123	8.0795	0.143	0	22.6033	3.3204	0.1727	0.0306	0.0098	101.445	13106	20150	8
LLP001 PLAGGM5	4.0478	0.1312	53.3498	29.3876	0.3946	0.9214	0.0082	0.0025	12.5364	0.221	0.104	0	0.0054	101.11	13889	20682	8
LLP001 PLAGGM6	6.1443	0.9032	53.3576	24.425	2.9555	3.1957	0.0778	0.0932	6.9014	1.3993	0.1676	0.0065	0	99.6272	8587	17748	8
LLP001 PLAGGM7	4.3647	0.1065	54.0001	28.8093	0.4547	0.8334	0.0056	0.0048	11.765	0.2356	0.0697	0	0.0082	100.658	8658	17531	12
LLP001 PLAGGM8	5.8823	0.1903	57.461	25.8255	0.8573	1.2713	0.0242	0	8.9447	0.4263	0.1024	0	0.0116	100.997	8800	17977	12
LLP001 PLAGGM9	3.8757	0.1332	52.7258	29.5754	0.3539	0.9276	0.0104	0.0025	12.7831	0.2368	0.0946	0	0.004	100.723	8847	18165	12
LLP001 PLAGGM10	3.5466	2.362	52.1897	25.1481	0.4749	2.3659	0.0439	0.0092	14.0499	0.9741	0.1384	0.0049	0.0092	101.317	8672	18264	12

## Sheet: all normalised
id	Na2O	MgO	SiO2	Al2O3	K2O	FeO	MnO	Cl	CaO	TiO2	F	Cr2O3	NiO	Total
LLP001 CPX1C dif	0.643485	11.9227	44.4125	8.74597	0.0147181	7.85601	0.112488	0	22.4762	3.56321	0.173654	0.0672826	0.0117553	100
LLP001 CPX1C	0.654918	11.968	45.2277	8.90935	0.0201438	7.81775	0.0982623	0.00510964	21.6972	3.39732	0.127741	0.0643618	0.0121845	100
LLP001 CPX2C	0.696759	14.4887	52.2022	2.51533	0.0180685	6.76298	0.188107	0	22.3574	0.587665	0.160858	0.0220728	0	100
LLP001 CPX2R	0.462659	14.0373	49.2488	4.60399	0.0177043	7.07085	0.116887	0	22.2852	1.98327	0.147796	0.0192693	0.00626007	100
LLP001 CPX11X2C	0.656698	12.3446	46.1607	7.89112	0.0165579	7.6873	0.105852	0.00374524	22.107	2.78695	0.136307	0.0686955	0.034397	100
LLP001 CPX11X2R	0.48976	14.0197	49.3522	4.70651	0.0179145	6.90696	0.0987743	0.00910407	22.2982	1.88405	0.181005	0.0255501	0.0101809	100
LLP001 CPX3C	0.944019	9.77662	43.873	8.91627	0.00845507	10.3651	0.237037	0	22.1846	3.5176	0.162023	0.0152388	0	100
LLP001 CPX3R	0.485536	14.0575	49.3606	4.62287	0.0179139	6.91801	0.116979	0.000489452	22.3144	1.90641	0.189124	0.00988693	0	100
LLP001 CPX4C	0.56645	12.5738	46.3057	7.25839	0.0112246	7.33598	0.129969	0	22.5616	3.08431	0.144246	0.00994463	0.0185108	100
LLP001 CPX5C	0.607089	11.9111	44.7557	8.91047	0.0122724	7.77349	0.142221	0	22.0719	3.55356	0.131038	0.127277	0.0037609	100
LLP001 CPX6C	0.578727	12.2091	45.4841	8.2264	0.0180421	7.80079	0.121562	0	22.0275	3.21425	0.165928	0.138323	0.015183	100
LLP001 CPX7C	0.680453	11.7706	46.1813	7.46981	0.00797983	8.23361	0.160483	0.0110338	22.2892	3.01716	0.173586	0.00482731	0	100
LLP001 CPX7R	0.408885	13.4177	47.9039	5.28677	0.027364	7.67718	0.163889	0.00895728	22.2588	2.66937	0.14371	0.0131898	0.0202769	100
LLP001 CPX8C	0.447312	13.5163	48.1371	5.83246	0.0100255	6.89024	0.0853147	0.00491444	22.46	2.17346	0.114212	0.317571	0.0110083	100
LLP001 CPX8M	0.963716	11.0572	47.1774	6.26898	0.0165377	9.71444	0.267458	0.00630009	22.0375	2.30563	0.184081	0.000590633	0	100
LLP001 CPX8R	0.444083	12.9431	47.214	5.82705	0.0125619	7.93166	0.171941	0	22.3862	2.89827	0.171254	0	0	100
LLP001 CPX9C	0.903627	10.2609	45.4504	7.69697	0.00829287	10.2301	0.243949	0	22.2035	2.86005	0.141966	0	0.000394899	100
LLP001 CPX9R	0.426125	13.8954	48.566	4.82215	0.0123857	7.48369	0.162979	0	22.0904	2.33745	0.176053	0.0243781	0.00294897	100
LLP001 CPX10C	0.622795	12.6184	46.7399	7.37253	0.012897	7.52966	0.114202	0	22.0048	2.7695	0.174257	0.0282552	0.0129954	100
LLP001 CPX10R	0.576232	12.4167	46.186	7.4178	0.000591311	7.78559	0.113137	0	22.386	2.95458	0.131961	0.0183306	0.0130088	100
LLP001 CPX11C	0.774843	11.4058	45.8952	7.64962	0.0122897	8.66859	0.212957	0	22.2445	2.94295	0.162618	0.0306752	0	100
LLP001 CPX11M	0.545889	12.3334	45.734	7.71444	0.01428	7.73463	0.1233	0	22.2873	3.26509	0.17136	0.0471732	0.0292494	100
LLP001 CPX11R	0.436526	14.0018	48.9167	4.63422	0.00461361	7.13794	0.152642	0	22.4034	2.2	0.109254	0.00284669	0.000196324	100
LLP001 CPX12R	0.452673	14.1835	49.4227	4.43992	0.0125989	6.96678	0.148627	0.00285443	22.2556	1.92861	0.16221	0.0208669	0.00295286	100
LLP001 CPX13C	0.673773	12.1019	46.3086	7.5566	0.0126208	8.18983	0.137239	0	21.9964	2.85579	0.161785	0	0.00556509	100
LLP001 CPX13R	0.561704	12.4325	46.1101	7.41895	0.0152905	7.90242	0.122423	0.00887835	22.2401	2.94347	0.203511	0.0311729	0.00947024	100
LLP001 CPX14C	0.610455	12.5234	46.8276	7.06995	0.0139099	7.54003	0.104965	0.000197303	22.2858	2.65905	0.141959	0.217132	0.00552448	100
LLP001 CPX14R	0.466586	13.9609	49.4124	4.7122	0.0189901	6.94969	0.124174	0	22.2528	1.9055	0.178684	0.0116105	0.00629724	100
LLP001 OX1	0.0122287	6.4392	0.0843189	5.79838	0	70.5779	0.416663	0	0.00473369	16.1895	0.330175	0.120512	0.0264298	100
LLP001 OX2	0.00615035	5.06888	0.0744986	4.67447	0	74.4393	0.558293	0	0.0342237	14.773	0.358705	0.00505916	0.00743994	100
LLP001 OX4	0	5.76748	0.0861293	5.81084	0	71.3649	0.447156	0.00258587	0.00517174	16.1884	0.296181	0.0227755	0.00825489	100
LLP001 OX6	0.0071243	6.95678	0.0959801	6.5401	0.000890537	68.8861	0.384415	0.0130612	0.0429437	16.3946	0.30496	0.298726	0.0742114	100
LLP001 OX7	0.00937286	5.97396	0.065018	5.57063	0	71.1281	0.429376	0	0.00424245	16.4106	0.327853	0.0238761	0.0569278	100
LLP001 OX8	0	6.51603	0.0881002	6.32569	0	69.7115	0.408247	0	0.0143349	16.0786	0.341351	0.463298	0.0528601	100
LLP001 OX9INAMPH	0.00240702	6.46636	0.0876556	6.14402	0	70.6057	0.4114	0.00852486	0.00732135	15.6325	0.323543	0.279014	0.0315921	100
LLP001 OX10	0	5.98819	0.0708597	5.09812	0	72.3288	0.423369	0	0.00357777	15.6951	0.340285	0.014808	0.0368709	100
LLP001 OX5INOL	0	8.60166	0.0927987	12.7647	0	56.8724	0.305918	0	0.0125189	10.3315	0.303732	10.5547	0.160162	100
LLP001 OL1C	0.00976413	40.6607	38.726	0.0272069	0.00843697	19.703	0.316623	0.00180115	0.258702	0.0190543	0.145798	0.0143144	0.108448	100
LLP001 OL1C	0.0130997	40.7361	38.7952	0.0232135	0.0106917	19.5326	0.287327	0.00240804	0.246198	0.0276443	0.177135	0.01859	0.129745	100
LLP001 OL1X2C	0.0145442	40.6464	38.9794	0.0234647	0.00407238	19.4559	0.32356	0	0.251906	0.0144473	0.15795	0.00736907	0.121299	100
LLP001 OL1X2R	0.0115112	40.2665	38.8406	0.0168315	0.0177021	19.9881	0.302193	0	0.269013	0.0405309	0.151386	0	0.0955718	100
LLP001 OL2C	0.0117607	40.9694	38.9473	0.025353	0.0114715	19.1802	0.260953	0	0.272039	0.0305586	0.157806	0.00375957	0.129464	100
LLP001 OL3C	0.0127882	40.7773	38.8154	0.0249952	0.00426275	19.4942	0.298392	0.000968806	0.258381	0.0304205	0.120423	0.0196668	0.142899	100
LLP001 OL3R	0.0152398	40.6236	38.8823	0.0238789	0.00271792	19.646	0.274316	0.00630947	0.277811	0.0287323	0.091827	0.0197049	0.107358	100
LLP001 OL4C	0.0116985	41.0831	38.8438	0.0251517	0.00419196	19.1611	0.279886	0.000974874	0.270722	0.0274914	0.148668	0	0.143306	100
LLP001 OL4R	0.00565301	41.0667	38.8807	0.0219298	0.00721246	19.1005	0.295906	0.00633527	0.289083	0.0485379	0.144249	0.0065302	0.1269	100
LLP001 OL6C	0.0153955	41.2867	38.9277	0.0265037	0.00672336	18.8687	0.259678	0	0.27254	0.0376119	0.13739	0.0100363	0.151032	100
LLP001 OL6R	0.0211107	41.1751	38.8801	0.0263399	0.00571343	18.9952	0.249939	0.00484189	0.281701	0.0338932	0.178278	0	0.147775	100
LLP001 ANF1C	2.48504	13.1172	39.9945	13.6163	1.06944	10.7283	0.117934	0.0094228	12.163	6.23908	0.428093	0.0313432	0	100
LLP001 AMP2C	2.64655	12.3565	39.8809	13.4122	1.02778	12.2673	0.145299	0.00409435	11.9597	5.90804	0.375981	0.002896	0.0126825	100
LLP001 AMP2R	2.61197	12.2507	39.8654	13.4755	1.04864	12.3514	0.184168	0.0176586	11.9064	5.8799	0.394374	0.0107747	0.00319251	100
LLP001 AMP3C	2.55478	11.5937	39.7656	13.4497	1.04456	12.9981	0.231083	0.00788237	12.0474	5.93203	0.356203	0.0189576	0	100
LLP001 AMP3R	2.5827	11.7293	39.9362	13.3281	1.07957	12.8971	0.195209	0.0206857	11.9925	5.8411	0.350151	0.0300244	0.017372	100
LLP001 AMP4C	2.54474	12.5148	39.9329	13.5013	1.10152	11.8373	0.149043	0.00600173	11.9792	6.05925	0.366106	0	0.00800231	100
LLP001 AMP4R	2.49982	12.4435	40.0141	13.4538	1.08764	11.9371	0.123089	0.0138762	11.9831	6.03496	0.404207	0.0037935	0.000998289	100
LLP001 AMP5C	2.42182	12.0834	39.5925	13.4852	1.29637	12.235	0.178554	0.0160678	12.0501	6.26334	0.373376	0.00411738	0	100
LLP001 AMP5R	8.21274	2.13359	49.4069	20.5412	4.08265	7.55854	0.153889	0.129476	4.7581	2.58844	0.417783	0.0120581	0.00474417	100
LLP001 AMP6C	2.50838	13.0467	40.1915	13.5417	1.06046	10.7901	0.123535	0.0126625	12.0865	6.19787	0.402011	0.0360932	0.00239292	100
LLP001 AMP6R	2.48792	12.8353	40.1497	13.4464	1.06795	11.2615	0.115117	0.000996684	12.057	6.14705	0.369869	0.0570103	0.00418607	100
LLP001 PLAGGM10	3.50051	2.3313	51.5114	24.8213	0.468728	2.33515	0.0433295	0.00908044	13.8673	0.961441	0.136601	0.00483632	0.00908044	100
LLP001 PLAGGM1	3.76941	0.150322	52.5263	29.3494	0.367444	0.972217	0	0	12.569	0.218515	0.0755594	0.00169237	0	100
LLP001 PLAGGM9	3.84788	0.132244	52.3473	29.3631	0.35136	0.920942	0.0103253	0.00248205	12.6913	0.2351	0.093921	0	0.00397129	100
LLP001 PLAG1GM dif	3.91644	0.127762	52.5209	29.2876	0.383583	0.938437	0.00917522	0.000690608	12.4919	0.216654	0.0998421	0.00305841	0.00404499	100
LLP001 PLAGGM5	4.00337	0.12976	52.7642	29.065	0.390269	0.911287	0.00811	0.00247256	12.3988	0.218574	0.102858	0	0.00534073	100
LLP001 PLAGGM2	4.10046	0.105726	52.8183	29.0846	0.385815	0.806048	0.0187913	0	12.3351	0.227474	0.117693	0	0	100
LLP001 PLAGGM7	4.33619	0.105804	53.6473	28.6211	0.451729	0.827955	0.00556341	0.00476864	11.6881	0.234061	0.0692446	0	0.00814643	100
LLP001 PLAGGM3	4.37217	0.0930018	53.548	28.7007	0.473428	0.83355	0.0243647	0	11.6349	0.244736	0.0731931	0	0.00178278	100
LLP001 PLAGGM8	5.82423	0.188421	56.8937	25.5705	0.848836	1.25875	0.0239611	0	8.85639	0.422091	0.101389	0	0.0114855	100
LLP001 PLAGGM6	6.16729	0.90658	53.5573	24.5164	2.96656	3.20766	0.0780911	0.0935487	6.92722	1.40454	0.168227	0.00652432	0	100

## Sheet: cpx
id	Na2O	MgO	SiO2	Al2O3	K2O	FeO	MnO	Cl	CaO	TiO2	F	Cr2O3	NiO	Total				Comment	Mean Z	Point#	Date
LLP001 CPX1C dif	0.643485	11.9227	44.4125	8.74597	0.0147181	7.85601	0.112488	0	22.4762	3.56321	0.173654	0.0672826	0.0117553	100
LLP001 CPX1C	0.654918	11.968	45.2277	8.90935	0.0201438	7.81775	0.0982623	0.00510964	21.6972	3.39732	0.127741	0.0643618	0.0121845	100
LLP001 CPX2C	0.696759	14.4887	52.2022	2.51533	0.0180685	6.76298	0.188107	0	22.3574	0.587665	0.160858	0.0220728	0	100
LLP001 CPX2R	0.462659	14.0373	49.2488	4.60399	0.0177043	7.07085	0.116887	0	22.2852	1.98327	0.147796	0.0192693	0.00626007	100
LLP001 CPX11X2C	0.656698	12.3446	46.1607	7.89112	0.0165579	7.6873	0.105852	0.00374524	22.107	2.78695	0.136307	0.0686955	0.034397	100
LLP001 CPX11X2R	0.48976	14.0197	49.3522	4.70651	0.0179145	6.90696	0.0987743	0.00910407	22.2982	1.88405	0.181005	0.0255501	0.0101809	100
LLP001 CPX3C	0.944019	9.77662	43.873	8.91627	0.00845507	10.3651	0.237037	0	22.1846	3.5176	0.162023	0.0152388	0	100
LLP001 CPX3R	0.485536	14.0575	49.3606	4.62287	0.0179139	6.91801	0.116979	0.000489452	22.3144	1.90641	0.189124	0.00988693	0	100
LLP001 CPX4C	0.56645	12.5738	46.3057	7.25839	0.0112246	7.33598	0.129969	0	22.5616	3.08431	0.144246	0.00994463	0.0185108	100
LLP001 CPX5C	0.607089	11.9111	44.7557	8.91047	0.0122724	7.77349	0.142221	0	22.0719	3.55356	0.131038	0.127277	0.0037609	100
LLP001 CPX6C	0.578727	12.2091	45.4841	8.2264	0.0180421	7.80079	0.121562	0	22.0275	3.21425	0.165928	0.138323	0.015183	100
LLP001 CPX7C	0.680453	11.7706	46.1813	7.46981	0.00797983	8.23361	0.160483	0.0110338	22.2892	3.01716	0.173586	0.00482731	0	100
LLP001 CPX7R	0.408885	13.4177	47.9039	5.28677	0.027364	7.67718	0.163889	0.00895728	22.2588	2.66937	0.14371	0.0131898	0.0202769	100
LLP001 CPX8C	0.447312	13.5163	48.1371	5.83246	0.0100255	6.89024	0.0853147	0.00491444	22.46	2.17346	0.114212	0.317571	0.0110083	100
LLP001 CPX8M	0.963716	11.0572	47.1774	6.26898	0.0165377	9.71444	0.267458	0.00630009	22.0375	2.30563	0.184081	0.000590633	0	100
LLP001 CPX8R	0.444083	12.9431	47.214	5.82705	0.0125619	7.93166	0.171941	0	22.3862	2.89827	0.171254	0	0	100
LLP001 CPX9C	0.903627	10.2609	45.4504	7.69697	0.00829287	10.2301	0.243949	0	22.2035	2.86005	0.141966	0	0.000394899	100
LLP001 CPX9R	0.426125	13.8954	48.566	4.82215	0.0123857	7.48369	0.162979	0	22.0904	2.33745	0.176053	0.0243781	0.00294897	100
LLP001 CPX10C	0.622795	12.6184	46.7399	7.37253	0.012897	7.52966	0.114202	0	22.0048	2.7695	0.174257	0.0282552	0.0129954	100
LLP001 CPX10R	0.576232	12.4167	46.186	7.4178	0.000591311	7.78559	0.113137	0	22.386	2.95458	0.131961	0.0183306	0.0130088	100
LLP001 CPX11C	0.774843	11.4058	45.8952	7.64962	0.0122897	8.66859	0.212957	0	22.2445	2.94295	0.162618	0.0306752	0	100
LLP001 CPX11M	0.545889	12.3334	45.734	7.71444	0.01428	7.73463	0.1233	0	22.2873	3.26509	0.17136	0.0471732	0.0292494	100
LLP001 CPX11R	0.436526	14.0018	48.9167	4.63422	0.00461361	7.13794	0.152642	0	22.4034	2.2	0.109254	0.00284669	0.000196324	100
LLP001 CPX12R	0.452673	14.1835	49.4227	4.43992	0.0125989	6.96678	0.148627	0.00285443	22.2556	1.92861	0.16221	0.0208669	0.00295286	100
LLP001 CPX13C	0.673773	12.1019	46.3086	7.5566	0.0126208	8.18983	0.137239	0	21.9964	2.85579	0.161785	0	0.00556509	100
LLP001 CPX13R	0.561704	12.4325	46.1101	7.41895	0.0152905	7.90242	0.122423	0.00887835	22.2401	2.94347	0.203511	0.0311729	0.00947024	100
LLP001 CPX14C	0.610455	12.5234	46.8276	7.06995	0.0139099	7.54003	0.104965	0.000197303	22.2858	2.65905	0.141959	0.217132	0.00552448	100
LLP001 CPX14R	0.466586	13.9609	49.4124	4.7122	0.0189901	6.94969	0.124174	0	22.2528	1.9055	0.178684	0.0116105	0.00629724	100

## Sheet: oxides
id	Na2O	MgO	SiO2	Al2O3	K2O	FeO	MnO	Cl	CaO	TiO2	F	Cr2O3	NiO	Total
LLP001 OX1	0.0122287	6.4392	0.0843189	5.79838	0	70.5779	0.416663	0	0.00473369	16.1895	0.330175	0.120512	0.0264298	100
LLP001 OX2	0.00615035	5.06888	0.0744986	4.67447	0	74.4393	0.558293	0	0.0342237	14.773	0.358705	0.00505916	0.00743994	100
LLP001 OX4	0	5.76748	0.0861293	5.81084	0	71.3649	0.447156	0.00258587	0.00517174	16.1884	0.296181	0.0227755	0.00825489	100
LLP001 OX6	0.0071243	6.95678	0.0959801	6.5401	0.000890537	68.8861	0.384415	0.0130612	0.0429437	16.3946	0.30496	0.298726	0.0742114	100
LLP001 OX7	0.00937286	5.97396	0.065018	5.57063	0	71.1281	0.429376	0	0.00424245	16.4106	0.327853	0.0238761	0.0569278	100
LLP001 OX8	0	6.51603	0.0881002	6.32569	0	69.7115	0.408247	0	0.0143349	16.0786	0.341351	0.463298	0.0528601	100
LLP001 OX9INAMPH	0.00240702	6.46636	0.0876556	6.14402	0	70.6057	0.4114	0.00852486	0.00732135	15.6325	0.323543	0.279014	0.0315921	100
LLP001 OX10	0	5.98819	0.0708597	5.09812	0	72.3288	0.423369	0	0.00357777	15.6951	0.340285	0.014808	0.0368709	100
LLP001 OX5INOL	0	8.60166	0.0927987	12.7647	0	56.8724	0.305918	0	0.0125189	10.3315	0.303732	10.5547	0.160162	100

## Sheet: olivine
id	Na2O	MgO	SiO2	Al2O3	K2O	FeO	MnO	Cl	CaO	TiO2	F	Cr2O3	NiO	Total
LLP001 OL1C	0.00976413	40.6607	38.726	0.0272069	0.00843697	19.703	0.316623	0.00180115	0.258702	0.0190543	0.145798	0.0143144	0.108448	100
LLP001 OL1C	0.0130997	40.7361	38.7952	0.0232135	0.0106917	19.5326	0.287327	0.00240804	0.246198	0.0276443	0.177135	0.01859	0.129745	100
LLP001 OL1X2C	0.0145442	40.6464	38.9794	0.0234647	0.00407238	19.4559	0.32356	0	0.251906	0.0144473	0.15795	0.00736907	0.121299	100
LLP001 OL1X2R	0.0115112	40.2665	38.8406	0.0168315	0.0177021	19.9881	0.302193	0	0.269013	0.0405309	0.151386	0	0.0955718	100
LLP001 OL2C	0.0117607	40.9694	38.9473	0.025353	0.0114715	19.1802	0.260953	0	0.272039	0.0305586	0.157806	0.00375957	0.129464	100
LLP001 OL3C	0.0127882	40.7773	38.8154	0.0249952	0.00426275	19.4942	0.298392	0.000968806	0.258381	0.0304205	0.120423	0.0196668	0.142899	100
LLP001 OL3R	0.0152398	40.6236	38.8823	0.0238789	0.00271792	19.646	0.274316	0.00630947	0.277811	0.0287323	0.091827	0.0197049	0.107358	100
LLP001 OL4C	0.0116985	41.0831	38.8438	0.0251517	0.00419196	19.1611	0.279886	0.000974874	0.270722	0.0274914	0.148668	0	0.143306	100
LLP001 OL4R	0.00565301	41.0667	38.8807	0.0219298	0.00721246	19.1005	0.295906	0.00633527	0.289083	0.0485379	0.144249	0.0065302	0.1269	100
LLP001 OL6C	0.0153955	41.2867	38.9277	0.0265037	0.00672336	18.8687	0.259678	0	0.27254	0.0376119	0.13739	0.0100363	0.151032	100
LLP001 OL6R	0.0211107	41.1751	38.8801	0.0263399	0.00571343	18.9952	0.249939	0.00484189	0.281701	0.0338932	0.178278	0	0.147775	100

## Sheet: amphibole
id	Na2O	MgO	SiO2	Al2O3	K2O	FeO	MnO	Cl	CaO	TiO2	F	Cr2O3	NiO	Total
LLP001 AMP1C	2.48504	13.1172	39.9945	13.6163	1.06944	10.7283	0.117934	0.0094228	12.163	6.23908	0.428093	0.0313432	0	100
LLP001 AMP2C	2.64655	12.3565	39.8809	13.4122	1.02778	12.2673	0.145299	0.00409435	11.9597	5.90804	0.375981	0.002896	0.0126825	100
LLP001 AMP2R	2.61197	12.2507	39.8654	13.4755	1.04864	12.3514	0.184168	0.0176586	11.9064	5.8799	0.394374	0.0107747	0.00319251	100
LLP001 AMP3C	2.55478	11.5937	39.7656	13.4497	1.04456	12.9981	0.231083	0.00788237	12.0474	5.93203	0.356203	0.0189576	0	100
LLP001 AMP3R	2.5827	11.7293	39.9362	13.3281	1.07957	12.8971	0.195209	0.0206857	11.9925	5.8411	0.350151	0.0300244	0.017372	100
LLP001 AMP4C	2.54474	12.5148	39.9329	13.5013	1.10152	11.8373	0.149043	0.00600173	11.9792	6.05925	0.366106	0	0.00800231	100
LLP001 AMP4R	2.49982	12.4435	40.0141	13.4538	1.08764	11.9371	0.123089	0.0138762	11.9831	6.03496	0.404207	0.0037935	0.000998289	100
LLP001 AMP5C	2.42182	12.0834	39.5925	13.4852	1.29637	12.235	0.178554	0.0160678	12.0501	6.26334	0.373376	0.00411738	0	100
LLP001 AMP5R	8.21274	2.13359	49.4069	20.5412	4.08265	7.55854	0.153889	0.129476	4.7581	2.58844	0.417783	0.0120581	0.00474417	100	¿?
LLP001 AMP6C	2.50838	13.0467	40.1915	13.5417	1.06046	10.7901	0.123535	0.0126625	12.0865	6.19787	0.402011	0.0360932	0.00239292	100
LLP001 AMP6R	2.48792	12.8353	40.1497	13.4464	1.06795	11.2615	0.115117	0.000996684	12.057	6.14705	0.369869	0.0570103	0.00418607	100

## Sheet: plag gm
id	Na2O	MgO	SiO2	Al2O3	K2O	FeO	MnO	Cl	CaO	TiO2	F	Cr2O3	NiO	Total	X	Y	Z
LLP001 PLAGGM10	3.50051	2.3313	51.5114	24.8213	0.468728	2.33515	0.0433295	0.00908044	13.8673	0.961441	0.136601	0.00483632	0.00908044	100
LLP001 PLAGGM1	3.76941	0.150322	52.5263	29.3494	0.367444	0.972217	0	0	12.569	0.218515	0.0755594	0.00169237	0	100
LLP001 PLAGGM9	3.84788	0.132244	52.3473	29.3631	0.35136	0.920942	0.0103253	0.00248205	12.6913	0.2351	0.093921	0	0.00397129	100
LLP001 PLAG1GM dif	3.91644	0.127762	52.5209	29.2876	0.383583	0.938437	0.00917522	0.000690608	12.4919	0.216654	0.0998421	0.00305841	0.00404499	100
LLP001 PLAGGM5	4.00337	0.12976	52.7642	29.065	0.390269	0.911287	0.00811	0.00247256	12.3988	0.218574	0.102858	0	0.00534073	100
LLP001 PLAGGM2	4.10046	0.105726	52.8183	29.0846	0.385815	0.806048	0.0187913	0	12.3351	0.227474	0.117693	0	0	100
LLP001 PLAGGM7	4.33619	0.105804	53.6473	28.6211	0.451729	0.827955	0.00556341	0.00476864	11.6881	0.234061	0.0692446	0	0.00814643	100
LLP001 PLAGGM3	4.37217	0.0930018	53.548	28.7007	0.473428	0.83355	0.0243647	0	11.6349	0.244736	0.0731931	0	0.00178278	100
LLP001 PLAGGM8	5.82423	0.188421	56.8937	25.5705	0.848836	1.25875	0.0239611	0	8.85639	0.422091	0.101389	0	0.0114855	100
LLP001 PLAGGM6	6.16729	0.90658	53.5573	24.5164	2.96656	3.20766	0.0780911	0.0935487	6.92722	1.40454	0.168227	0.00652432	0	100
