# Supplementary material for: Petrology of the opening eruptive phase of the 2021 Cumbre Vieja eruption, La Palma, Canary Islands
Source: Research Square preprint supplement (doi:10.21203/rs.3.rs-963593/v1), 2021-10-13
Supplement: Supplementary file 6 [file f0781b07188cbb38d73ab357.xlsx]

## Sheet: whole-rock data raw
id	type	coordinates	collection date and time	SiO2	Al2O3	Fe2O3	MnO	MgO	CaO	Na2O	K2O	TiO2	P2O5	Zr	LOI	Total	li	rb	cs	be	sr	ba	sc	v	cr	co	ni	cu	zn	ga	y	nb	ta	zr	hf	mo	sn	tl	pb	u	th	la	ce	pr	nd	sm	eu	gd	tb
CAN_LLP_0001	lava	28.618758, -17.88479	21/09/2021	43.7	14.98	13.28	0.2	6.04	10.49	4.38	1.8	3.89	1.03	317.5	0	99.79	10.147	36.713	0.386	2.595	1155.13	652.221	25.644	344.208	81.417	43.41	52.692	84.916	139.041	24.892	36.826	87.246	5.353	353.407	8.172	5.286	2.935	0.046	4.069	2.488	8.08	98.949	192.946	22.671	87.834	16.162	4.624	12.11	1.706
CAN_LLP_0002	lava	28.618613, -17.903585	21/09/21	43.77	14.92	13.08	0.2	5.94	10.44	4.39	1.79	3.91	1.02	315	0	99.46	10.113	37.293	0.392	2.608	1176.27	645.848	24.343	335.761	79.375	41.886	50.959	84.643	138.659	24.741	36.01	87.113	5.255	350.464	8.154	4.371	3.257	0.034	3.961	2.488	8.144	98.161	189.883	22.083	86.757	15.863	4.544	11.864	1.663
CAN_LLP_0003	lava	28.618585, -17.904383	22/09/2021	43.67	15.04	13.22	0.2	6.08	10.56	4.42	1.8	3.88	1.03	319.2	0	99.9	9.997	37.498	0.395	2.571	1155.26	636.791	25.009	341.307	80.746	42.396	52.286	81.255	139.999	24.832	36.479	87.079	5.342	351.532	8.103	4.2	2.881	0.015	4.51	2.478	8.19	98.028	189.192	22.281	85.268	15.872	4.537	11.69	1.662
CAN_LLP_0004	lava	28.618711, -17.904324	23/9/2021	43.36	14.51	13.15	0.19	6.43	10.73	4.21	1.73	3.94	1	306.7	0.03	99.28	9.582	36.013	0.38	2.509	1114.69	624.206	27.584	347.931	111.494	44.435	61.014	82.908	138.797	24.55	36.22	83.974	5.139	340.542	7.968	4.042	2.888	0.006	4.512	2.344	7.627	93.311	182.707	21.39	83.901	15.705	4.531	11.742	1.642
CAN_TLP_0009	tephra	mobile collection on north side of volcano, within 5km of vent	22/09/2021, 17.00-17.30	44.43	15.47	12.58	0.2	5.32	9.6	4.8	1.97	3.72	1.13	337.5	0	99.22	11.005	41.616	0.433	2.74	1231.78	669.278	19.558	304.938	84.846	39.651	51.368	89.815	139.563	25.247	36.381	91.78	5.274	365.989	8.085	4.897	2.779	0.106	5.039	2.733	8.994	102.412	196.302	22.588	86.343	15.804	4.463	11.659	1.642
CAN_TLP_0008	tephra	28.624518, -17.884743	22/09/2021, 24.00	43.93	15.07	12.99	0.2	5.76	10.06	4.53	1.87	3.83	1.07	323.5	0	99.31	10.646	39.384	0.412	2.653	1189.98	664.791	22.871	332.511	101.244	41.694	56.315	86.34	142.949	25.153	36.381	89.878	5.461	362.144	8.225	4.505	2.759	0.104	4.789	2.588	8.548	100.313	193.273	22.403	86.181	15.868	4.504	11.934	1.657
CAN_TLP_0011	tephra	28.661182, -17.914099	25/9/2021, 06.00-08.30	44.66	15.73	12.2	0.19	5.3	9.46	4.86	2.02	3.69	1.02	332.2	0	99.13	11.232	44.28	0.468	2.774	1229.57	707.271	19.747	314.736	89.214	40.459	54.969	97.246	139.909	24.936	35.801	95.443	5.603	369.157	8.017	5.242	2.928	0.129	5.59	2.776	9.18	104.372	197.68	22.689	86.397	15.579	4.489	11.578	1.62
[truncated: 6 more columns]

## Sheet: whole-rock data normalised
id	type	coordinates	collection date and time	SiO2	Al2O3	FeO	MnO	MgO	CaO	Na2O	K2O	TiO2	P2O5	Zr	LOI	Total	K2O+Na2O	AI	ASI	li	rb	cs	be	sr	ba	sc	v	cr	co	ni	cu	zn	ga	y	nb	ta	zr	hf	mo	sn	tl	pb	u	th	la	ce	pr	nd	sm
CAN_LLP_0001	lava	28.618758, -17.88479	21/09/2021	44.3772	15.2121	12.1494	0.203099	6.1336	10.6526	4.44788	1.82789	3.95028	1.04596	317.5	0	100	6.27577	0.609765	2.35789	10.147	36.713	0.386	2.595	1155.13	652.221	25.644	344.208	81.417	43.41	52.692	84.916	139.041	24.892	36.826	87.246	5.353	353.407	8.172	5.286	2.935	0.046	4.069	2.488	8.08	98.949	192.946	22.671	87.834	16.162
CAN_LLP_0002	lava	28.618613, -17.903585	21/09/21	44.5887	15.1991	12.0042	0.203741	6.05111	10.6353	4.47212	1.82348	3.98314	1.03908	315	0	100	6.2956	0.612602	2.38672	10.113	37.293	0.392	2.608	1176.27	645.848	24.343	335.761	79.375	41.886	50.959	84.643	138.659	24.741	36.01	87.113	5.255	350.464	8.154	4.371	3.257	0.034	3.961	2.488	8.144	98.161	189.883	22.083	86.757	15.863
CAN_LLP_0003	lava	28.618585, -17.904383	22/09/2021	44.2946	15.2551	12.0803	0.202861	6.16696	10.711	4.48322	1.82574	3.93549	1.04473	319.2	0	100	6.30896	0.611708	2.38481	9.997	37.498	0.395	2.571	1155.26	636.791	25.009	341.307	80.746	42.396	52.286	81.255	139.999	24.832	36.479	87.079	5.342	351.532	8.103	4.2	2.881	0.015	4.51	2.478	8.19	98.028	189.192	22.281	85.268	15.872
CAN_LLP_0004	lava	28.618711, -17.904324	23/9/2021	44.2689	14.8142	12.0952	0.193983	6.56479	10.9549	4.29825	1.76626	4.02259	1.02096	306.7	0.0306289	100	6.06451	0.605073	2.3881	9.582	36.013	0.38	2.509	1114.69	624.206	27.584	347.931	111.494	44.435	61.014	82.908	138.797	24.55	36.22	83.974	5.139	340.542	7.968	4.042	2.888	0.006	4.512	2.344	7.627	93.311	182.707	21.39	83.901	15.705
CAN_ALP_0009	tephra	mobile collection on north side of volcano, within 5km of vent	22/09/2021, 17.00-17.30	45.3491	15.79	11.5678	0.204137	5.43005	9.79858	4.89929	2.01075	3.79695	1.15338	337.5	0	100	6.91004	0.64689	2.42333	11.005	41.616	0.433	2.74	1231.78	669.278	19.558	304.938	84.846	39.651	51.368	89.815	139.563	25.247	36.381	91.78	5.274	365.989	8.085	4.897	2.779	0.106	5.039	2.733	8.994	102.412	196.302	22.588	86.343	15.804
CAN_ALP_0008	tephra	28.624518, -17.884743	22/09/2021, 24.00	44.8161	15.374	11.9388	0.204034	5.87619	10.2629	4.62138	1.90772	3.90726	1.09158	323.5	0	100	6.5291	0.627475	2.37121	10.646	39.384	0.412	2.653	1189.98	664.791	22.871	332.511	101.244	41.694	56.315	86.34	142.949	25.153	36.381	89.878	5.461	362.144	8.225	4.505	2.759	0.104	4.789	2.588	8.548	100.313	193.273	22.403	86.181	15.868
CAN_ALP_0011	tephra	28.661182, -17.914099	25/9/2021, 06.00-08.30	45.6082	16.064	11.2243	0.194034	5.41253	9.66085	4.96319	2.06289	3.76834	1.04166	332.2	0	100	7.02607	0.645878	2.4895	11.232	44.28	0.468	2.774	1229.57	707.271	19.747	314.736	89.214	40.459	54.969	97.246	139.909	24.936	35.801	95.443	5.603	369.157	8.017	5.242	2.928	0.129	5.59	2.776	9.18	104.372	197.68	22.689	86.397	15.579
[truncated: 9 more columns]
